# Supplementary material for: Changes in light absorption and composition of chromophoric marine-dissolved organic matter across a microbial bloom
Source: Royal Society of Chemistry journal article supplement (doi:10.1039/d2em00150k), 2022-01-01
Supplement: d2em00150k1.pdf [file d2em00150k1.pdf]

Electronic Supplementary Information: Changes in Light Absorption and Composition of Chromophoric  
Marine-Dissolved Organic Matter Across a Microbial Bloom

Michael R. Alves,<sup>1</sup> Elizabeth K. Coward,<sup>1</sup> David Gonzales,<sup>1</sup> Jon S. Sauer,<sup>1</sup> Kathryn J. Mayer,<sup>2</sup> Kimberly A.  
Prather,<sup>1,3</sup> Vicki H. Grassian<sup>1\*</sup>

<sup>1</sup>Department of Chemistry and Biochemistry, University of California San Diego, La Jolla, California

92093, United States

<sup>2</sup>Now at Department of Chemistry, Colorado State University, Fort Collins, Colorado, 80523, United

States

<sup>3</sup>Scripps Institution of Oceanography, University of California San Diego, La Jolla, California 92093,

United States

## Supplemental Schemes:

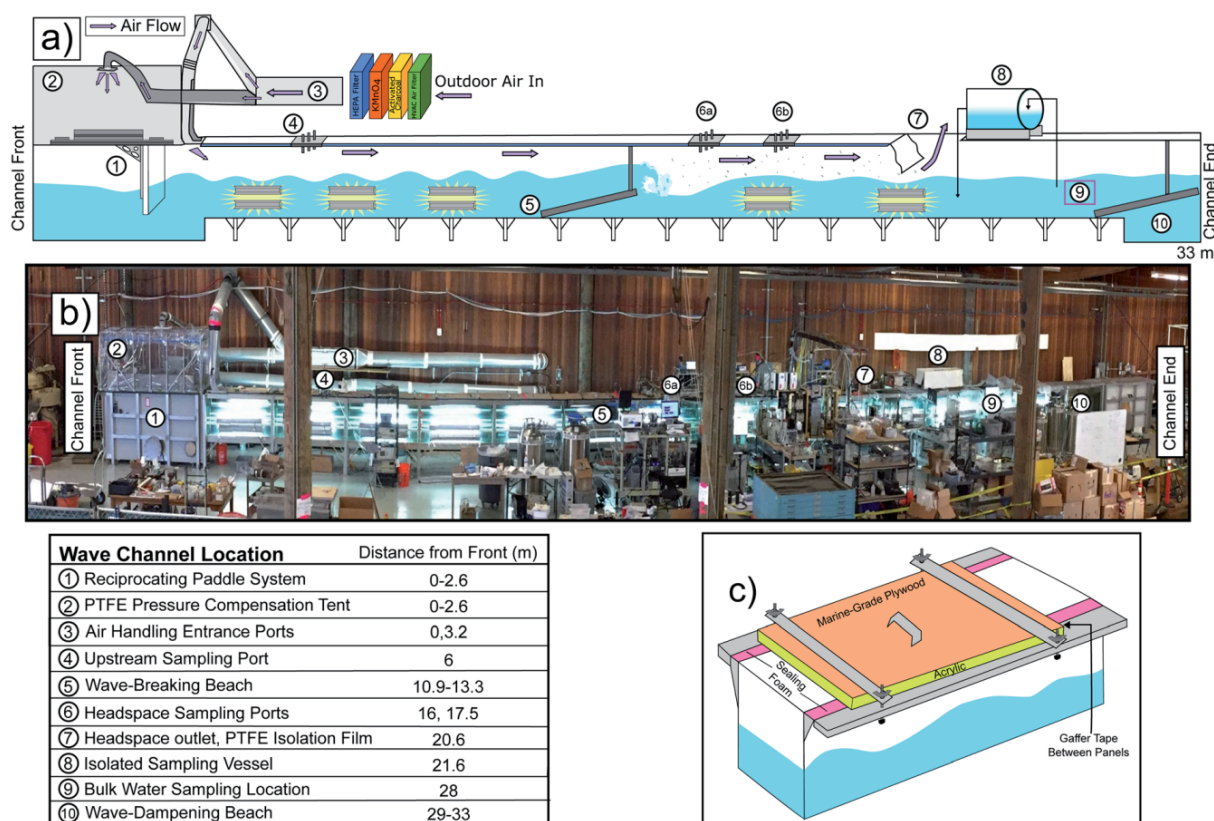

Scheme S1. (a) Schematic of the SIO Ocean-Atmosphere Interaction Facility (OAIF) wave channel with key points labeled by number and described in the table, (b) photograph of the SIO OAIF channel with key points marked, (c) cross sectional view of wave channel lids which were used to seal the channel headspace. Republished with permission from J. S. Sauer, K. J. Mayer, C. Lee, M. R. Alves, S. Amiri, C. J. Bahaveolos, E. B. Franklin, D. R. Crocker, D. Dang, J. Dinasquet, L. A. Garofalo, C. P. Kaluarachchi, D. B. Kilgour, L. E. Mael, B. A. Mitts, D. R. Moon, A. N. Moore, C. K. Morris, C. A. Mullenmeister, C. M. Ni, M. A. Pendergraft, D. Petras, R. M. C. Simpson, S. Smith, P. R. Tumminello, J. L. Walker, P. J. Demott, D. K. Farmer, A. H. Goldstein, V. H. Grassian, J. S. Jaffe, F. Malfatti, T. R. Martz, J. H. Slade, A. V. Tivanski, T. H. Bertram, C. D. Cappa and K. A. Prather, The Sea Spray Chemistry and Particle Evolution study (SeaSCAPE): Overview and experimental methods, *Environ. Sci. Process. Impacts*, 2022, **24**, 290–315, with permission from the Royal Society of Chemistry.

**Supplemental Figures:**

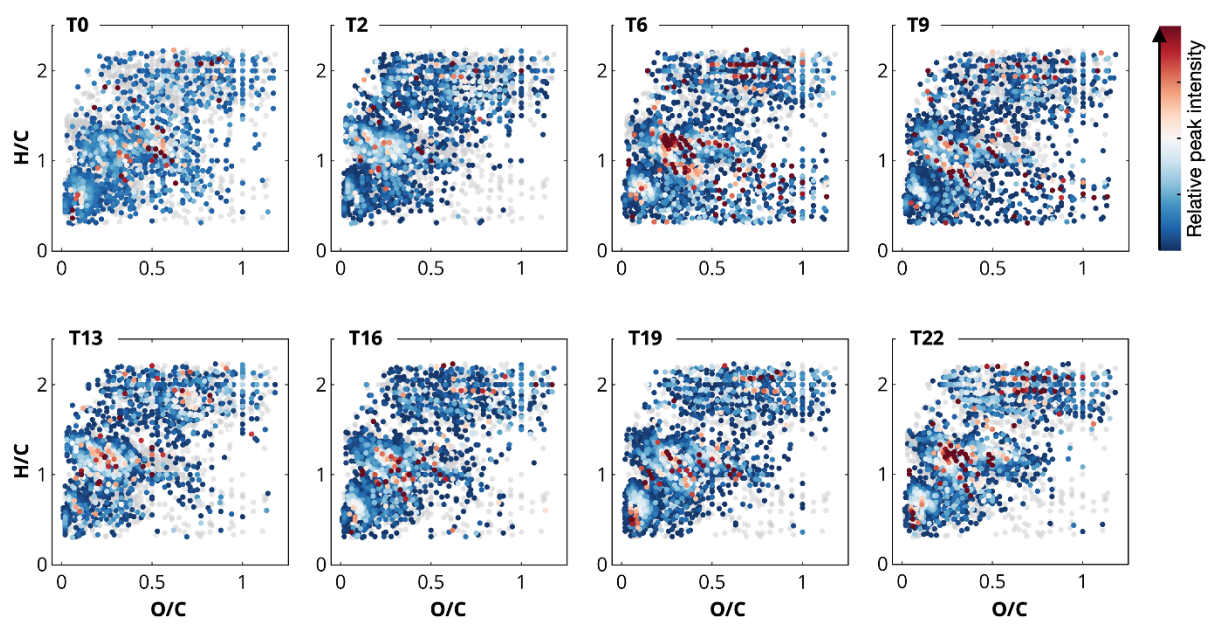

Figure S1. Van Krevelen diagrams of m-DOM samples collected throughout the bloom, colored by their normalized relative peak intensity.

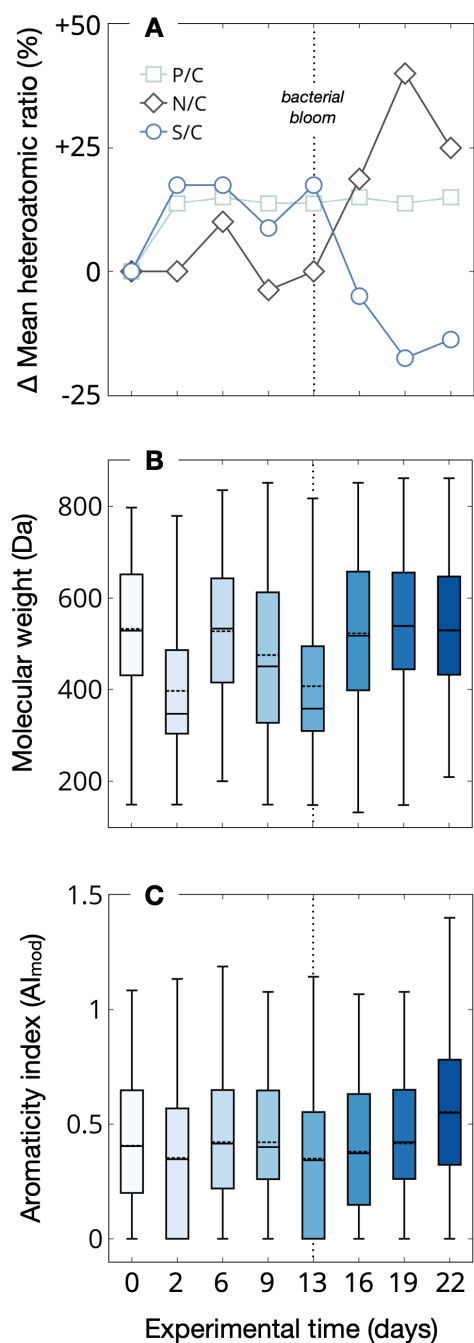

Figure S2. (A) Percent change in mean heteroatomic ratios of nitrogen (N), sulfur (S), and phosphorous (P) atoms per carbon (C) atom. (B) Molecular weight (Da) distributions, and (C) aromaticity index  $AI_{mod}$  distributions of all assigned formulae over experimental sampling time. Medians and means in box plots (B) and (C) are denoted by solid and dashed lines, respectively.

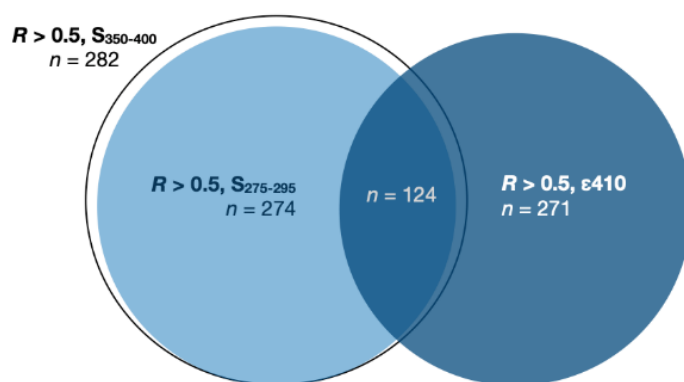

Figure S3. Changes in dissolved organic matter formulae parameters over experimental time.

## Supplemental Tables:

Table S1. Summary of data analysis of the T0-22 samples.

|                                    | T0     | T2     | T6     | T9     | T13    | T16    | T19    | T22    |
|------------------------------------|--------|--------|--------|--------|--------|--------|--------|--------|
| Formula count (n)                  | 1598   | 2343   | 2463   | 2441   | 1780   | 2168   | 2289   | 2090   |
| <i>Compound class abundance, %</i> |        |        |        |        |        |        |        |        |
| Polycyclic Aromatics               | 22.71% | 16.76% | 22.76% | 23.44% | 16.60% | 20.81% | 20.40% | 21.87% |
| Highly Aromatic                    | 15.14% | 11.84% | 16.47% | 14.27% | 11.78% | 14.47% | 16.32% | 15.62% |
| Highly Unsaturated                 | 40.70% | 42.43% | 38.35% | 40.46% | 42.30% | 40.15% | 37.97% | 39.71% |
| Unsaturated Aliphatic-no N         | 9.51%  | 9.38%  | 11.27% | 8.45%  | 11.34% | 9.69%  | 11.73% | 11.45% |
| Unsaturated Aliphatic-N            | 8.84%  | 14.84% | 9.18%  | 10.07% | 11.78% | 12.51% | 11.73% | 9.96%  |
| Saturated                          | 3.09%  | 4.75%  | 1.97%  | 3.30%  | 6.19%  | 2.37%  | 1.85%  | 1.39%  |
| <i>Mean population parameters</i>  |        |        |        |        |        |        |        |        |
| H:C                                | 1.11   | 1.23   | 1.11   | 1.11   | 1.25   | 1.18   | 1.18   | 1.18   |
| O:C                                | 0.39   | 0.32   | 0.39   | 0.35   | 0.35   | 0.35   | 0.36   | 0.36   |
| DBE                                | 15.6   | 14.9   | 15.8   | 17.2   | 14.4   | 15.5   | 15.0   | 14.9   |
| MW (Da)                            | 552    | 601    | 593    | 621    | 583    | 580    | 566    | 567    |
| Al <sub>mod</sub>                  | 0.42   | 0.36   | 0.45   | 0.45   | 0.38   | 0.43   | 0.42   | 0.44   |

Table. S2. List of identified molecular formulae with an  $R \geq 0.5$  with one or more datasets

| Mol. weight (Da) | O/C  | H/C  | R; $\epsilon(410\text{ nm})$ | R; S350-400 | R; S275-295 |
|------------------|------|------|------------------------------|-------------|-------------|
| 148.04           | 0.25 | 0.88 | -0.09                        | 0.9         | 0.84        |
| 149.02           | 0.38 | 0.75 | -0.74                        | -0.57       | -0.64       |
| 162.09           | 0.1  | 1.3  | 0.5                          | -0.92       | -0.96       |
| 165.13           | 0.09 | 1.64 | -0.56                        | -0.51       | -0.96       |
| 195.04           | 0.5  | 1    | -0.77                        | 0.98        | 0.32        |
| 200.07           | 0.17 | 0.92 | 0.01                         | 0.29        | 0.14        |
| 211.11           | 0.07 | 1.07 | -0.91                        | 1           | 1           |
| 215.14           | 0.07 | 1.33 | 0.02                         | -0.99       | -0.97       |
| 221.03           | 0.27 | 0.91 | -0.81                        | 0.27        | -0.34       |
| 225.02           | 0.4  | 1    | -0.56                        | -1          | -1          |
| 230.05           | 0.33 | 0.75 | -0.88                        | -0.37       | -0.25       |
| 235.04           | 0.25 | 1    | -0.61                        | -0.36       | -0.32       |
| 241              | 0.89 | 0.67 | -0.52                        | 0.72        | 0.54        |
| 241.09           | 0.2  | 0.93 | 0.56                         | 0.97        | 0.97        |
| 247.03           | 0.27 | 0.82 | 0.1                          | 0.23        | 0.82        |
| 251.06           | 0.27 | 1.18 | 0.48                         | -0.34       | 0.11        |
| 253.07           | 0.27 | 1.36 | 0.08                         | -0.72       | -0.5        |
| 257.01           | 0.25 | 0.58 | 0.46                         | 0.47        | 0.61        |
| 258.01           | 0.27 | 0.55 | -0.97                        | -0.1        | 0.02        |
| 259.03           | 0.25 | 0.75 | 0.61                         | 0.52        | 0.95        |
| 260.02           | 0.27 | 0.73 | 0.64                         | 1           | 1           |
| 263.02           | 0.36 | 0.82 | 0.93                         | 0.97        | 0.83        |
| 265.04           | 0.36 | 1    | 0.98                         | 1           | 0.98        |
| 267.09           | 0.25 | 1.42 | 0.42                         | -0.87       | -0.79       |
| 269.01           | 0.23 | 0.54 | -0.21                        | 0.17        | 0.31        |
| 270.01           | 0.25 | 0.5  | 0.95                         | 0.51        | 0.7         |
| 272.02           | 0.25 | 0.67 | 0.25                         | 0.69        | 0.73        |
| 273.01           | 0.33 | 0.58 | -0.62                        | 0.44        | 0.25        |
| 274.04           | 0.25 | 0.83 | 0.82                         | 0.68        | 0.92        |
| 275.02           | 0.33 | 0.75 | 0.42                         | 0.86        | 0.75        |
| 277              | 0.45 | 0.64 | -0.38                        | 0.59        | -0.32       |
| 277.04           | 0.33 | 0.92 | 0.4                          | -0.06       | -0.13       |
| 277.05           | 0.29 | 1    | 0.67                         | 0.74        | 0.99        |

|        |      |      |       |       |       |
|--------|------|------|-------|-------|-------|
| 279    | 0.27 | 0.82 | -1    | 0.99  | 0.6   |
| 279.13 | 0.42 | 2    | 0.67  | 0.08  | 0.64  |
| 281.01 | 0.21 | 0.5  | -0.13 | 0.34  | 0.38  |
| 281.03 | 0.45 | 1    | -0.24 | -1    | -1    |
| 283.06 | 0.88 | 2    | -0.94 | -0.99 | -0.88 |
| 284.02 | 0.23 | 0.62 | 0.07  | -0.64 | -0.3  |
| 285.01 | 0.31 | 0.54 | 0.07  | 0.39  | 0.4   |
| 286    | 0.33 | 0.5  | 0.39  | 0.48  | 0.59  |
| 286.06 | 0.73 | 1.18 | -0.21 | 1     | 1     |
| 287.02 | 0.31 | 0.69 | 0.09  | 0.65  | 0.67  |
| 288.02 | 0.33 | 0.67 | -0.89 | -1    | -1    |
| 289.04 | 0.31 | 0.85 | 0.27  | 0.28  | 0.06  |
| 290.07 | 0.23 | 1.08 | 0.37  | -0.45 | 0.47  |
| 292.09 | 0.23 | 1.23 | 0.98  | 1     | 1     |
| 293.01 | 0.2  | 0.47 | 0.32  | 0.07  | 0.21  |
| 293.02 | 0.25 | 0.92 | 0.93  | -0.77 | -0.89 |
| 293.11 | 0.21 | 1.36 | 0.56  | -0.39 | -0.51 |
| 295.03 | 0.2  | 0.6  | 0.51  | 0.04  | 0.65  |
| 295.06 | 0.78 | 1.78 | -0.56 | -0.67 | -1    |
| 295.09 | 0.31 | 1.31 | 0.81  | -1    | -1    |
| 295.12 | 0.21 | 1.5  | 1     | 1     | 1     |
| 296.02 | 0.21 | 0.57 | -0.67 | -0.65 | -0.55 |
| 297.01 | 0.29 | 0.5  | -0.42 | -0.24 | -0.24 |
| 297.04 | 1    | 1.75 | -0.49 | -0.61 | -0.47 |
| 298.04 | 0.21 | 0.71 | 0.5   | 1     | 1     |
| 298.08 | 0.38 | 1.31 | -0.13 | 1     | 0.99  |
| 299.02 | 0.29 | 0.64 | 0.29  | 0.44  | 0.55  |
| 299.06 | 1    | 2    | -0.75 | -0.56 | -0.98 |
| 299.09 | 0.21 | 1.5  | -0.09 | 0.94  | 0.58  |
| 300.02 | 0.31 | 0.62 | 0.48  | -0.1  | 0.26  |
| 300.05 | 0.21 | 0.86 | 0.69  | 0.36  | 0.77  |
| 301    | 0.38 | 0.54 | -0.55 | 0.99  | 0.59  |
| 301.98 | 0.25 | 0.5  | 0.68  | 0.46  | 0.79  |
| 302.03 | 0.31 | 0.77 | 0.72  | 0.93  | 0.96  |
| 303.02 | 0.38 | 0.69 | -0.38 | -1    | 1     |
| 304.05 | 0.31 | 0.92 | 0.9   | 0.88  | 0.82  |



|        |      |      |       |       |       |
|--------|------|------|-------|-------|-------|
| 305.03 | 0.38 | 0.85 | 0.04  | 0.63  | 0.45  |
| 307.03 | 0.19 | 0.56 | 0.1   | 0.08  | 0.41  |
| 307.03 | 0.55 | 1.45 | -0.95 | -0.35 | -0.46 |
| 307.05 | 0.73 | 1.45 | -0.6  | 0.1   | 0.06  |
| 309.01 | 0.27 | 0.47 | -0.38 | -0.33 | -0.09 |
| 309.04 | 0.19 | 0.69 | 0.37  | 0.88  | 0.68  |
| 309.06 | 0.38 | 1.15 | 0.9   | 0.5   | 0.97  |
| 310    | 0.29 | 0.43 | -0.63 | -0.94 | -0.96 |
| 310.04 | 0.2  | 0.67 | 0.96  | -1    | -1    |
| 311.01 | 0.27 | 0.53 | -0.95 | -0.57 | -0.44 |
| 311.02 | 1.13 | 1.5  | 0.39  | -0.45 | 0.26  |
| 311.02 | 0.27 | 0.6  | -0.14 | 0.12  | -0.07 |
| 312.02 | 0.29 | 0.57 | 0.3   | 0.03  | 0.63  |
| 312.05 | 0.2  | 0.8  | 0.84  | 0.54  | 0.93  |
| 313    | 0.36 | 0.5  | 0.35  | 0.13  | 0.06  |
| 313.03 | 1.13 | 1.75 | -0.46 | -0.74 | -1    |
| 313.07 | 0.89 | 2    | -0.48 | -0.62 | -0.95 |
| 314.03 | 0.29 | 0.71 | -0.09 | 0.35  | 0.85  |
| 314.05 | 0.55 | 1.27 | -0.51 | -0.28 | -0.08 |
| 314.07 | 0.2  | 0.93 | 0.77  | 0.82  | 0.84  |
| 315.02 | 0.36 | 0.64 | 0.46  | 0.44  | 0.55  |
| 315.09 | 0.45 | 1.55 | 0.27  | 1     | 1     |
| 315.12 | 0.2  | 1.67 | 0.74  | -1    | -1    |
| 316.05 | 0.29 | 0.86 | 0.74  | 0.49  | 0.79  |
| 317.03 | 0.36 | 0.79 | 0.5   | 0.66  | 0.96  |
| 317.97 | 0.33 | 0.5  | 0.12  | 0.54  | 0.54  |
| 318.06 | 0.29 | 1    | 0.66  | 0.33  | 0.81  |
| 318.1  | 0.2  | 1.2  | 0.8   | 0.09  | 0.67  |
| 319    | 0.64 | 1.18 | -0.98 | -0.44 | -0.94 |
| 319.03 | 0.18 | 0.53 | -0.32 | -0.33 | -0.48 |
| 319.05 | 0.36 | 0.93 | -0.79 | 0.17  | 0.13  |
| 319.05 | 0.67 | 1.33 | 0.69  | 0.64  | 0.92  |
| 319.12 | 0.19 | 1.31 | 0.55  | -0.42 | 0.34  |
| 320.08 | 0.29 | 1.14 | 0.89  | 0.59  | 0.67  |
| 321.01 | 0.31 | 0.85 | -0.65 | -0.51 | -0.1  |
| 321.04 | 0.18 | 0.65 | 0.65  | 0.67  | 0.7   |

|        |      |      |       |       |       |
|--------|------|------|-------|-------|-------|
| 321.1  | 0.27 | 1.27 | -0.17 | 0.72  | 0.55  |
| 323.02 | 0.25 | 0.56 | 0.62  | 0.7   | 0.69  |
| 323.04 | 0.82 | 1.45 | 0.86  | 0.31  | 0.37  |
| 323.06 | 0.18 | 0.76 | 0.54  | 1     | 1     |
| 325    | 0.33 | 0.47 | -0.67 | -0.99 | -0.97 |
| 325.04 | 0.25 | 0.69 | -0.29 | -0.06 | -0.64 |
| 326.03 | 0.27 | 0.67 | 0.98  | 1     | 1     |
| 326.07 | 0.19 | 0.88 | 0.98  | 0.14  | 0.03  |
| 327.02 | 0.33 | 0.6  | -0.14 | 0.43  | 0.26  |
| 327.05 | 0.25 | 0.81 | 0.55  | 0.37  | 0.26  |
| 328.05 | 0.27 | 0.8  | 0.85  | 0.68  | 0.66  |
| 328.09 | 0.19 | 1    | 0.8   | -0.11 | 0.02  |
| 329.03 | 0.33 | 0.73 | 0.5   | 0.53  | 0.89  |
| 329.08 | 0.5  | 1.36 | -0.22 | 0.02  | -0.51 |
| 330.06 | 0.27 | 0.93 | 0.78  | 0.45  | 0.42  |
| 331.05 | 0.62 | 1.23 | -0.7  | 0.28  | 0.19  |
| 331.08 | 1    | 2.22 | -0.99 | 0.27  | -0.86 |
| 331.12 | 0.18 | 1.24 | 0.91  | -0.3  | -0.01 |
| 332.08 | 0.27 | 1.07 | 0.67  | 0.06  | 0.64  |
| 332.12 | 0.19 | 1.25 | -0.62 | -1    | -1    |
| 333.04 | 0.17 | 0.61 | 0.95  | 1     | 1     |
| 335.04 | 0.43 | 0.93 | 0.88  | -1    | -1    |
| 335.04 | 0.75 | 1.33 | -0.3  | -0.1  | -0.05 |
| 336.08 | 0.5  | 1.07 | 1     | 0.54  | 0.62  |
| 336.97 | 0.45 | 0.55 | -0.93 | 1     | 1     |
| 337.04 | 0.24 | 0.65 | -0.37 | -0.21 | -0.84 |
| 339.05 | 0.24 | 0.76 | 0.99  | 1     | 1     |
| 341.03 | 0.31 | 0.69 | 0.11  | 0.17  | 0.02  |
| 341.05 | 0.91 | 1.64 | 0.79  | 0.62  | 0.6   |
| 342.06 | 0.25 | 0.88 | 0.85  | 0.22  | 0.07  |
| 343.11 | 0.25 | 1.56 | -0.99 | 1     | -1    |
| 344.04 | 0.33 | 0.8  | -1    | -1    | -1    |
| 344.08 | 0.25 | 1    | 0.5   | -0.04 | -0.32 |
| 344.12 | 0.18 | 1.18 | -0.67 | -0.59 | -0.87 |
| 345.03 | 0.4  | 0.73 | -0.95 | 1     | 0.78  |
| 346.06 | 0.33 | 0.93 | 0.99  | 1     | 1     |

|        |      |      |       |       |       |
|--------|------|------|-------|-------|-------|
| 346.1  | 0.25 | 1.13 | 0.95  | 0.3   | 0.45  |
| 346.13 | 0.18 | 1.29 | -0.88 | -0.97 | -0.97 |
| 347.04 | 0.4  | 0.87 | -0.07 | -0.08 | 0.13  |
| 347.12 | 0.24 | 1.24 | -0.47 | -0.44 | -0.4  |
| 347.12 | 0.35 | 1.18 | 0.88  | 0.41  | 0.27  |
| 348.08 | 0.33 | 1.07 | 0.97  | 1     | 1     |
| 349.06 | 0.4  | 1    | 0.43  | -0.38 | 0     |
| 349.1  | 0.31 | 1.19 | 0.66  | 0.62  | 0.52  |
| 353.07 | 0.22 | 0.83 | 0.93  | -0.92 | -0.02 |
| 353.2  | 0.17 | 1.72 | -0.01 | -0.88 | -0.97 |
| 355.01 | 0.38 | 0.56 | -0.59 | -0.18 | -0.3  |
| 355.05 | 0.29 | 0.76 | -0.18 | -0.37 | -0.68 |
| 355.08 | 0.31 | 1.31 | -0.13 | 1     | 1     |
| 355.15 | 0.17 | 1.61 | 0.69  | 0.44  | 0.73  |
| 356.08 | 0.24 | 0.94 | -0.09 | -0.15 | -0.67 |
| 357.03 | 0.38 | 0.69 | -0.39 | 0.05  | -0.55 |
| 357.06 | 0.29 | 0.88 | 0.25  | -0.3  | -0.24 |
| 357.09 | 0.31 | 1.44 | 0.63  | 0.95  | 0.96  |
| 357.13 | 0.24 | 1.59 | 0.32  | 0.78  | 0.87  |
| 357.14 | 0.16 | 1.21 | 0.52  | 0.1   | 0.56  |
| 358.1  | 0.24 | 1.06 | 0.1   | -0.51 | -0.54 |
| 359.04 | 0.38 | 0.81 | 0.09  | 0.11  | -0.12 |
| 360.08 | 0.31 | 1    | -0.18 | -0.24 | -0.47 |
| 361.06 | 0.38 | 0.94 | 0.26  | -0.37 | -0.84 |
| 361.07 | 0.5  | 0.88 | 0.67  | 0.95  | 0.56  |
| 361.1  | 0.41 | 1.06 | 0.28  | 0.88  | 0.48  |
| 361.13 | 0.44 | 1.63 | 0.96  | 0.1   | -0.5  |
| 362.09 | 0.31 | 1.13 | 0.9   | 0.85  | 1     |
| 363.01 | 0.38 | 0.81 | 0.88  | 1     | 1     |
| 363.04 | 0.47 | 0.87 | 0.35  | 0.4   | 0.61  |
| 363.08 | 0.38 | 1.06 | 0.32  | 0.13  | 0.09  |
| 363.11 | 0.29 | 1.24 | 0.94  | -1    | -1    |
| 365.05 | 0.47 | 1    | 0.6   | -1    | -1    |
| 367.05 | 0.28 | 0.72 | -0.78 | 0.6   | -0.11 |
| 367.12 | 0.15 | 1.05 | 0.61  | 0.65  | 0.27  |
| 369.14 | 0.15 | 1.15 | 0.48  | 1     | 1     |

|        |      |      |       |       |       |
|--------|------|------|-------|-------|-------|
| 371.04 | 0.35 | 0.76 | -0.04 | -0.63 | -0.09 |
| 371.09 | 0.18 | 1.47 | -0.36 | -1    | -1    |
| 371.15 | 0.15 | 1.25 | 0.63  | -0.4  | -0.43 |
| 372.08 | 0.29 | 0.94 | -0.27 | 0.4   | 0.31  |
| 372.11 | 0.22 | 1.11 | 0.26  | -0.84 | -0.68 |
| 373.06 | 0.35 | 0.88 | 0.28  | -0.11 | -0.17 |
| 373.13 | 0.21 | 1.21 | 0.9   | -0.5  | -0.45 |
| 374.09 | 0.29 | 1.06 | -0.46 | 0.94  | 0.98  |
| 375.06 | 0.69 | 1.31 | 0.91  | -0.32 | -0.64 |
| 375.11 | 0.28 | 1.17 | -0.47 | -0.04 | -0.04 |
| 377.05 | 0.44 | 0.94 | 0.28  | -0.15 | -0.23 |
| 377.09 | 0.35 | 1.12 | 0.55  | 0.94  | 0.91  |
| 379.07 | 0.44 | 1.06 | 0.73  | -1    | -1    |
| 384.11 | 0.21 | 1.05 | 0.35  | -1    | 1     |
| 385.06 | 0.33 | 0.83 | -0.75 | 0.75  | 0.82  |
| 385.12 | 0.28 | 1.5  | -0.68 | 0.48  | -0.25 |
| 386.13 | 0.21 | 1.16 | 0.69  | -1    | -1    |
| 387.04 | 0.41 | 0.76 | 0.45  | 0.76  | 1     |
| 388.14 | 0.21 | 1.26 | 0.87  | -1    | -1    |
| 389.05 | 0.41 | 0.88 | 0.05  | -1    | -1    |
| 390.08 | 0.67 | 1.5  | -0.87 | -0.99 | -0.96 |
| 393.04 | 0.15 | 0.7  | 0.25  | 0.86  | 0.8   |
| 395.06 | 0.91 | 1.55 | -0.3  | 0.6   | 0.51  |
| 397.06 | 0.32 | 0.79 | 0.11  | -0.2  | 0.09  |
| 397.16 | 0.2  | 1.55 | -1    | -0.85 | -1    |
| 397.17 | 0.14 | 1.23 | 0.24  | 0.8   | 0.74  |
| 398.09 | 0.26 | 0.95 | 0.06  | 0     | 0.03  |
| 399.04 | 0.39 | 0.72 | -0.2  | -1    | -1    |
| 399.11 | 0.44 | 1.33 | -0.32 | -0.77 | -0.66 |
| 399.12 | 0.75 | 2    | -0.82 | -0.35 | -0.91 |
| 399.18 | 0.14 | 1.32 | -0.84 | -0.58 | -0.92 |
| 401.05 | 0.39 | 0.83 | -0.84 | -0.31 | -0.4  |
| 401.09 | 0.53 | 1.29 | -0.97 | -0.7  | -0.92 |
| 403.07 | 0.39 | 0.94 | 0.23  | -1    | 1     |
| 405.13 | 0.42 | 1.16 | -0.78 | 0.6   | -0.11 |
| 405.23 | 0.29 | 2.06 | -0.49 | -0.92 | -0.97 |

|        |      |      |       |       |       |
|--------|------|------|-------|-------|-------|
| 408.08 | 0.25 | 0.8  | 0.49  | 1     | 1     |
| 409.17 | 0.33 | 2.07 | -0.26 | 0.79  | -0.24 |
| 410.09 | 0.25 | 0.9  | 0.49  | 0.2   | 0.48  |
| 411.08 | 0.3  | 0.85 | -0.07 | 0.1   | -0.16 |
| 412.11 | 0.25 | 1    | 0.62  | -0.9  | -0.97 |
| 413.05 | 0.37 | 0.79 | -0.42 | 0.51  | 0.62  |
| 413.09 | 0.5  | 1.22 | -0.9  | 0.42  | -0.12 |
| 413.13 | 0.13 | 1.17 | -0.89 | 0.74  | 0.08  |
| 415.07 | 0.37 | 0.89 | 0.08  | -0.99 | -0.98 |
| 415.08 | 0.59 | 1.24 | 0.37  | 0.4   | 0.19  |
| 415.11 | 0.18 | 1.14 | -0.95 | 0.98  | 0.57  |
| 415.14 | 0.24 | 1.19 | 0.78  | -0.15 | -0.38 |
| 416.1  | 0.73 | 2.18 | -0.03 | -0.98 | -0.91 |
| 417.23 | 0.28 | 1.94 | 0.11  | -0.83 | -0.89 |
| 419.06 | 0.44 | 0.94 | 0.13  | -1    | -1    |
| 419.11 | 0.47 | 1.05 | -0.08 | -0.67 | -0.77 |
| 420.07 | 0.32 | 1.05 | 0.96  | -1    | -1    |
| 420.09 | 0.69 | 1.54 | -0.09 | -0.97 | -0.64 |
| 421.05 | 0.29 | 0.67 | -0.7  | 0.5   | -0.24 |
| 421.1  | 0.14 | 1.24 | 0.78  | 0.78  | 0.91  |
| 421.23 | 0.18 | 1.59 | -0.7  | -0.09 | -0.41 |
| 422.09 | 0.24 | 0.86 | 0.66  | 0.84  | 0.74  |
| 424.2  | 0.47 | 2.13 | -0.85 | -0.5  | -0.92 |
| 425.13 | 0.5  | 1.93 | 0.64  | 1     | -1    |
| 426.07 | 0.71 | 1    | 0.08  | 0.52  | 0.55  |
| 426.09 | 0.3  | 0.9  | 0.18  | -0.2  | -0.67 |
| 426.12 | 0.24 | 1.05 | 0.79  | 0.22  | 0.82  |
| 427.05 | 0.76 | 0.94 | -0.2  | 0.47  | 0.39  |
| 427.07 | 0.35 | 0.85 | 0.24  | -0.99 | -0.97 |
| 427.08 | 0.56 | 1.17 | 0.91  | 1     | 1     |
| 428.06 | 0.82 | 1.82 | 1     | -1    | 1     |
| 428.14 | 0.24 | 1.14 | 0.99  | 1     | -1    |
| 429.05 | 0.91 | 1.73 | 0.46  | -0.95 | -0.85 |
| 429.07 | 1.09 | 1.73 | 0.51  | 0.5   | 0.88  |
| 429.09 | 0.19 | 1.05 | -0.84 | 0.12  | -0.8  |
| 429.1  | 0.56 | 1.28 | 0.74  | 0.7   | 0.61  |

|        |      |      |       |       |       |
|--------|------|------|-------|-------|-------|
| 429.16 | 0.23 | 1.23 | 0.56  | 0.6   | 0.69  |
| 430.08 | 0.82 | 2    | 0.81  | -0.75 | -0.89 |
| 430.12 | 0.67 | 2.17 | 0.43  | -0.79 | -0.62 |
| 431.06 | 0.42 | 0.89 | 0.01  | -0.77 | -0.94 |
| 431.18 | 0.09 | 1.39 | 0.5   | 0.96  | 1     |
| 432.07 | 0.3  | 1    | -0.83 | -1    | 1     |
| 432.1  | 0.82 | 2.18 | 0.71  | -0.67 | -0.59 |
| 432.11 | 1    | 2.18 | -0.96 | 0.93  | 0.93  |
| 435.03 | 0.17 | 0.39 | -0.64 | 0.43  | -0.31 |
| 435.08 | 0.24 | 0.76 | -0.81 | 0.87  | -0.24 |
| 435.19 | 0.04 | 1.5  | 0.91  | 0.08  | 0.43  |
| 436.09 | 0.58 | 1    | -0.18 | 1     | 1     |
| 436.21 | 0.15 | 2    | -0.54 | 0.22  | 0.26  |
| 436.98 | 1    | 1    | -0.18 | 0.42  | 0.93  |
| 437.08 | 0.61 | 1    | 0.78  | -0.98 | -0.9  |
| 439.07 | 0.33 | 0.81 | 0.88  | -0.17 | 0.47  |
| 439.14 | 0.47 | 1.93 | 0.66  | 0.17  | 0.28  |
| 440.08 | 0.92 | 1.67 | -0.85 | 0.95  | 0.2   |
| 440.1  | 0.29 | 0.95 | 0.97  | 0.99  | 1     |
| 440.14 | 0.23 | 1.09 | -0.96 | -0.3  | -0.74 |
| 441.09 | 0.33 | 0.9  | -0.94 | -0.83 | -0.88 |
| 441.12 | 0.61 | 1.22 | 0.82  | -0.26 | 0.35  |
| 441.19 | 0.38 | 2.19 | -0.65 | -0.79 | -0.84 |
| 442.08 | 0.75 | 1.83 | 0.86  | -0.55 | -0.73 |
| 443    | 0.09 | 0.52 | 0.17  | 0.79  | 0.52  |
| 443.06 | 0.83 | 1.75 | -0.87 | 0.6   | 0.7   |
| 444.06 | 0.91 | 1.82 | -0.84 | -1    | -1    |
| 444.1  | 0.75 | 2    | 0.44  | -0.23 | -0.22 |
| 444.13 | 0.62 | 2.15 | 0.92  | -0.19 | 0.04  |
| 445.04 | 1    | 1.73 | 0.25  | 0.05  | 0.63  |
| 445.06 | 0.1  | 0.33 | -0.99 | -0.34 | -0.77 |
| 445.08 | 0.4  | 0.95 | -0.88 | 0.57  | 0.67  |
| 446.08 | 0.91 | 2    | 0.63  | -0.78 | -0.72 |
| 446.17 | 0.26 | 1.3  | -0.25 | -0.59 | -0.99 |
| 448.09 | 1.08 | 1.92 | -0.77 | 0     | -0.87 |
| 449.25 | 0.32 | 2.05 | -0.87 | -0.09 | -0.98 |

|        |      |      |       |       |       |
|--------|------|------|-------|-------|-------|
| 450.01 | 0.83 | 1.17 | -0.4  | -0.43 | 0.17  |
| 450.23 | 0.14 | 2    | -0.43 | -0.12 | -0.11 |
| 453.05 | 0.93 | 1.29 | 0.99  | -1    | -1    |
| 453.09 | 0.32 | 0.86 | -0.22 | -1    | -1    |
| 453.16 | 0.44 | 1.94 | 0.57  | 1     | 1     |
| 453.19 | 0.35 | 2.06 | 0.9   | 0.22  | 0.2   |
| 453.25 | 0.39 | 2.17 | -0.77 | -0.25 | -1    |
| 454.06 | 0.72 | 0.94 | -0.77 | -0.52 | -0.41 |
| 454.08 | 0.69 | 1.69 | -0.51 | 0.96  | 0.48  |
| 454.12 | 0.27 | 1    | 0.48  | -0.96 | -0.74 |
| 455.05 | 0.78 | 0.89 | 0.49  | 0.2   | 0.37  |
| 455.06 | 0.3  | 0.52 | -0.91 | -0.47 | -0.34 |
| 455.14 | 0.26 | 1.09 | -0.98 | -0.03 | -0.71 |
| 456.1  | 0.69 | 1.85 | -0.13 | -0.61 | -0.38 |
| 456.13 | 0.57 | 2    | 0.86  | 1     | -1    |
| 456.13 | 0.27 | 1.09 | -0.04 | -0.83 | -0.77 |
| 457.04 | 0.57 | 0.67 | 0.78  | 0.36  | 0.9   |
| 457.06 | 0.1  | 0.32 | -0.53 | 0.25  | 0.24  |
| 457.15 | 0.53 | 2.07 | -0.98 | -0.55 | -0.99 |
| 457.15 | 0.26 | 1.17 | -0.96 | -0.58 | -0.95 |
| 457.19 | 0.44 | 2.19 | 0.99  | 0.8   | 0.94  |
| 458.08 | 0.83 | 1.83 | 0.83  | 1     | 1     |
| 458.09 | 0.27 | 1.05 | 0.21  | 0.62  | 0.99  |
| 458.1  | 0.36 | 1    | -0.59 | 0.82  | 0.41  |
| 458.11 | 0.69 | 2    | 0.98  | 0.19  | 0.25  |
| 459.08 | 1.08 | 1.75 | -0.71 | 0.64  | 0.99  |
| 459.08 | 0.1  | 0.39 | -0.21 | 1     | 1     |
| 459.24 | 0.3  | 1.85 | -0.77 | -0.26 | -1    |
| 460.15 | 0.85 | 2.15 | 0.48  | 0.66  | 0.31  |
| 461.25 | 0.3  | 1.95 | -0.1  | -0.7  | -0.95 |
| 462.12 | 0.27 | 1.23 | 0.27  | 0.7   | 0.17  |
| 462.16 | 0.08 | 1.38 | 0.13  | 1     | 0.95  |
| 463.04 | 0.22 | 0.7  | 0.5   | -1    | -1    |
| 465.12 | 0.41 | 1.18 | -0.1  | 0.59  | 0.59  |
| 467.07 | 0.55 | 1    | -0.67 | -1    | -1    |
| 467.1  | 0.3  | 0.91 | -0.86 | -0.28 | -0.78 |

|        |      |      |       |       |       |
|--------|------|------|-------|-------|-------|
| 467.14 | 0.5  | 1.81 | -0.67 | 1     | 1     |
| 467.17 | 0.41 | 1.94 | -0.15 | -0.01 | 0.04  |
| 468.1  | 0.64 | 1.71 | 0.75  | 1     | 1     |
| 468.13 | 0.26 | 1.04 | 0.46  | -0.56 | -0.42 |
| 469.08 | 0.71 | 1.64 | -0.55 | -0.98 | -0.77 |
| 469.19 | 0.41 | 2.06 | 0.91  | 0.79  | 0.71  |
| 470.11 | 0.64 | 1.86 | -0.16 | -0.49 | -0.22 |
| 470.17 | 0.24 | 1.2  | -0.29 | 0.77  | -0.28 |
| 470.2  | 0.56 | 2.13 | 0.95  | 0.85  | 0.8   |
| 471.06 | 0.16 | 0.68 | 0.94  | 0.1   | 0.78  |
| 471.08 | 0.3  | 0.96 | -0.03 | -0.95 | -0.59 |
| 471.1  | 0.36 | 0.95 | -0.96 | -0.8  | -0.95 |
| 471.13 | 0.3  | 1.09 | -0.99 | 0.23  | 0.35  |
| 472.09 | 0.77 | 1.85 | 0.17  | -0.96 | -0.98 |
| 472.11 | 0.26 | 1.09 | -0.65 | 1     | 0.49  |
| 472.11 | 0.92 | 1.85 | 0.01  | 0.5   | 0.19  |
| 472.13 | 0.64 | 2    | 0.82  | -1    | -1    |
| 472.18 | 0.67 | 2.13 | 0.24  | 0.64  | 0.28  |
| 473.07 | 0.85 | 1.77 | 0.18  | -1    | -0.99 |
| 473.09 | 0.3  | 1.04 | -0.68 | 1     | 0.45  |
| 474.12 | 0.26 | 1.17 | 0.78  | 0.85  | 0.98  |
| 474.13 | 1.08 | 1.92 | -0.69 | 0.15  | 0.27  |
| 474.16 | 0.79 | 2.14 | 0.68  | 0.75  | 0.42  |
| 474.17 | 0.29 | 1.25 | -0.87 | -1    | -1    |
| 475.04 | 0.43 | 0.52 | 0.44  | -1    | -1    |
| 475.09 | 0.85 | 1.92 | 0.05  | -0.91 | -0.95 |
| 476.19 | 0.69 | 2.19 | 0.91  | -0.19 | 0.54  |
| 477.06 | 0.44 | 1.38 | 0.23  | 0.34  | -0.07 |
| 477.12 | 0.17 | 1.25 | 0.26  | 0.82  | 0.83  |
| 477.12 | 1    | 2.08 | 0.13  | 1     | 1     |
| 479.1  | 0.22 | 1.22 | -0.37 | 0.4   | 0.16  |
| 479.14 | 0.39 | 1.22 | -0.35 | 0.37  | 0.37  |
| 479.17 | 0.19 | 1.12 | 0.79  | 0.94  | 0.96  |
| 481.12 | 0.29 | 0.96 | -0.62 | -0.58 | -0.56 |
| 482.09 | 0.25 | 0.96 | -0.65 | 0.58  | 0.98  |
| 483.06 | 0.93 | 1.33 | -0.13 | 0.01  | 0.46  |



|        |      |      |       |       |       |
|--------|------|------|-------|-------|-------|
| 483.1  | 0.67 | 1.67 | 0.85  | -1    | -1    |
| 483.17 | 0.47 | 1.94 | 0.94  | 0.96  | 0.92  |
| 484.11 | 0.25 | 1.04 | 0.43  | 0.9   | 0.95  |
| 484.13 | 0.6  | 1.87 | 0.94  | 0.88  | 0.95  |
| 485.24 | 0.5  | 2.17 | -0.7  | -0.8  | -0.96 |
| 486.14 | 0.6  | 2    | 0.92  | -0.52 | -0.42 |
| 486.16 | 0.08 | 1.27 | 0.41  | 1     | 0.42  |
| 486.2  | 0.63 | 2.13 | -0.46 | 1     | 1     |
| 487.09 | 0.79 | 1.79 | -0.17 | -0.99 | -0.87 |
| 487.13 | 0.67 | 1.93 | 0.11  | -0.46 | -0.41 |
| 488.11 | 0.03 | 0.56 | 0.23  | -0.84 | -0.37 |
| 488.14 | 0.25 | 1.21 | 0.95  | 1     | -1    |
| 488.15 | 0.33 | 1.17 | -0.94 | 0.33  | -0.65 |
| 488.15 | 1    | 1.93 | -0.85 | -0.25 | -0.14 |
| 488.16 | 0.24 | 0.92 | 0.33  | -0.78 | -0.27 |
| 488.18 | 0.73 | 2.13 | 0.73  | -0.59 | -0.9  |
| 488.18 | 0.28 | 1.28 | -0.27 | -0.76 | -0.83 |
| 489.09 | 0.13 | 0.44 | 0.29  | -0.46 | -0.28 |
| 489.11 | 0.79 | 1.93 | 0.08  | -0.94 | -0.99 |
| 489.14 | 0.67 | 2.07 | 0.26  | -1    | -1    |
| 490.14 | 0.29 | 0.88 | 0.63  | -1    | -1    |
| 491.09 | 0.26 | 1.13 | 0.04  | -1    | -1    |
| 491.18 | 0.12 | 1.38 | -0.08 | 0.96  | 0.79  |
| 493.06 | 0.32 | 1.09 | 0.64  | -0.84 | -0.31 |
| 493.19 | 0.19 | 1.15 | 0.99  | -1    | -1    |
| 495.1  | 0.93 | 2    | -0.92 | 0.89  | 0.06  |
| 495.12 | 0.35 | 1.26 | 0.59  | 0.48  | 0.97  |
| 495.17 | 0.44 | 1.83 | 0.79  | 0.68  | 0.61  |
| 495.2  | 0.37 | 1.95 | 0.94  | 0.99  | 0.98  |
| 495.26 | 0.4  | 2.05 | 0.45  | -0.89 | -0.87 |
| 496.11 | 0.24 | 1    | -0.47 | 0.39  | 0.91  |
| 496.11 | 1.15 | 2.08 | 0.13  | 1     | 1     |
| 497.15 | 0.53 | 1.82 | -0.34 | -0.9  | -0.84 |
| 497.22 | 0.37 | 2.05 | 0.99  | 1     | 1     |
| 498.14 | 0.56 | 1.88 | 0.89  | -1    | -1    |
| 498.2  | 0.59 | 2    | -0.37 | 0.32  | -0.09 |

|        |      |      |       |       |       |
|--------|------|------|-------|-------|-------|
| 499.07 | 1    | 1.5  | -0.02 | 0.48  | 0.7   |
| 499.09 | 0.73 | 1.67 | 0.01  | -1    | -1    |
| 499.25 | 0.47 | 2.16 | -0.67 | -0.88 | -0.97 |
| 500.1  | 0.93 | 1.71 | -0.29 | -1    | -1    |
| 500.13 | 0.47 | 1.88 | 0.52  | -0.99 | -0.61 |
| 500.14 | 0.12 | 1.19 | -0.05 | 0.93  | 0.39  |
| 500.18 | 0.07 | 1.3  | 0.7   | 0.93  | 0.71  |
| 500.18 | 0.69 | 2    | 0.85  | 1     | 1     |
| 501.09 | 0.33 | 1    | -0.69 | 1     | 0.44  |
| 501.11 | 0.73 | 1.8  | -0.12 | -0.89 | -0.97 |
| 501.14 | 0.63 | 1.94 | 0.19  | -0.28 | -0.51 |
| 501.18 | 0.53 | 2.06 | 0.92  | -1    | -1    |
| 502.12 | 0.29 | 1.13 | 0.96  | -0.07 | 0.17  |
| 502.16 | 0.24 | 1.24 | 1     | -1    | -1    |
| 502.16 | 0.93 | 1.93 | -0.97 | -1    | -1    |
| 503.09 | 0.25 | 1.08 | -0.06 | -1    | -1    |
| 503.1  | 0.2  | 1.12 | -0.18 | 0.87  | 0.86  |
| 503.1  | 0.12 | 0.48 | -0.81 | -1    | -1    |
| 503.12 | 0.73 | 1.93 | 0.13  | -0.93 | -0.98 |
| 503.16 | 0.63 | 2.06 | 0.33  | -0.99 | -1    |
| 503.21 | 0.65 | 2.18 | -0.58 | 0.97  | 0.98  |
| 504.15 | 0.81 | 1.94 | 0.33  | -0.94 | -0.77 |
| 504.19 | 0.71 | 2.06 | -0.36 | 1     | 0.32  |
| 505.1  | 0.25 | 1.17 | 0.05  | -0.89 | -0.97 |
| 505.12 | 0.2  | 1.2  | -0.53 | 0.99  | 0.61  |
| 505.14 | 0.73 | 2.07 | -0.06 | -1    | -1    |
| 505.15 | 0.15 | 1.31 | -0.45 | 0.98  | 0.68  |
| 505.19 | 0.11 | 1.41 | -0.8  | -0.99 | -0.77 |
| 506.17 | 0.56 | 1.67 | 0.7   | -0.94 | 0.08  |
| 507.08 | 0.3  | 1.13 | 0.25  | -1    | -1    |
| 507.12 | 0.25 | 1.25 | -0.15 | -1    | -1    |
| 507.21 | 0.31 | 1.38 | 1     | 1     | 1     |
| 508.18 | 0.03 | 1.21 | -0.5  | 0.27  | -0.46 |
| 508.18 | 0.56 | 1.78 | -0.71 | -0.94 | -0.99 |
| 509.11 | 0.59 | 1.59 | -0.44 | 0.97  | 0.69  |
| 509.15 | 0.27 | 1.04 | -0.24 | -0.94 | -0.89 |

|        |      |      |       |       |       |
|--------|------|------|-------|-------|-------|
| 509.18 | 1    | 2.13 | -0.12 | 0.84  | 0.89  |
| 509.18 | 0.42 | 1.84 | 0.94  | 0.98  | 1     |
| 509.22 | 0.35 | 1.95 | 0.6   | 1     | 1     |
| 509.26 | 0.29 | 2.05 | -0.16 | 0.22  | 0.09  |
| 510.12 | 1.07 | 2.07 | -0.97 | 1     | 0.9   |
| 510.2  | 0.03 | 1.28 | 0.3   | -0.95 | -0.7  |
| 510.98 | 0.67 | 0.67 | -0.99 | -0.24 | -0.45 |
| 511.07 | 0.71 | 0.95 | 0.64  | 0.59  | 0.99  |
| 511.13 | 0.59 | 1.71 | -0.27 | -0.87 | -0.97 |
| 511.16 | 1.13 | 2.13 | -0.99 | 0.46  | 0.11  |
| 511.16 | 0.5  | 1.83 | 0.67  | -0.69 | -0.14 |
| 511.27 | 0.29 | 2.14 | 0.36  | 0.52  | 0.42  |
| 512.14 | 0.23 | 1.12 | 0.6   | 0.91  | 0.98  |
| 512.18 | 0.07 | 1.25 | -0.12 | -0.77 | -0.9  |
| 512.97 | 0.88 | 0.59 | -0.99 | -0.21 | -0.41 |
| 513.11 | 0.69 | 1.69 | -0.18 | -0.96 | -1    |
| 513.14 | 0.59 | 1.82 | -0.2  | -0.76 | -0.8  |
| 514.11 | 0.48 | 0.91 | 1     | 1     | 1     |
| 514.12 | 0.15 | 1.12 | 1     | -0.62 | 0.38  |
| 514.12 | 0.28 | 1.08 | -0.26 | 0.44  | 0.08  |
| 514.15 | 0.11 | 1.22 | 0.52  | 0.62  | 0.3   |
| 514.19 | 0.07 | 1.32 | 0.12  | -0.98 | -0.98 |
| 514.97 | 0.76 | 0.71 | -1    | -0.03 | -0.24 |
| 515.08 | 0.36 | 0.64 | -0.79 | 0.35  | -0.01 |
| 515.12 | 0.69 | 1.81 | 0.21  | -0.84 | -0.57 |
| 515.16 | 0.59 | 1.94 | 0.21  | -0.94 | -0.71 |
| 515.25 | 0.03 | 1.47 | -0.65 | -0.42 | -0.99 |
| 516.13 | 0.28 | 1.16 | -0.58 | 0.11  | -0.28 |
| 517.1  | 0.24 | 1.12 | -0.13 | -0.97 | -0.98 |
| 517.14 | 0.69 | 1.94 | 0.21  | -0.95 | -0.99 |
| 518.1  | 0.09 | 0.53 | -0.11 | 0.24  | -0.36 |
| 519.12 | 0.24 | 1.2  | -0.06 | -1    | -1    |
| 519.13 | 0.19 | 1.23 | 0.65  | 0.17  | 0.94  |
| 519.15 | 0.69 | 2.06 | 0.1   | -1    | -1    |
| 520.15 | 0.61 | 1.56 | -0.52 | -0.95 | -0.9  |
| 520.18 | 0.53 | 1.68 | 1     | -1    | -0.75 |

|        |      |      |       |       |       |
|--------|------|------|-------|-------|-------|
| 521.15 | 0.4  | 1.2  | 0.14  | 0.11  | -0.16 |
| 521.15 | 0.19 | 1.31 | -0.57 | -1    | -1    |
| 521.19 | 0.35 | 1.31 | 1     | 0.48  | 0.8   |
| 521.27 | 0.36 | 1.95 | -0.33 | -0.83 | -0.9  |
| 522.16 | 0.61 | 1.67 | 0.44  | 0.97  | 1     |
| 522.2  | 0.03 | 1.23 | -0.99 | -0.81 | -1    |
| 523.13 | 0.46 | 1.17 | -1    | 1     | 1     |
| 523.16 | 0.26 | 1.07 | 0.03  | 0.55  | 0.64  |
| 523.2  | 0.4  | 1.85 | 0.61  | 0.98  | 1     |
| 523.27 | 0.27 | 2.05 | -0.55 | -1    | -1    |
| 524.1  | 0.27 | 0.96 | -0.26 | -0.66 | -0.25 |
| 524.14 | 1    | 2.07 | -0.27 | -0.11 | 0     |
| 524.18 | 0.07 | 1.21 | 0.36  | 0.57  | 0.08  |
| 524.18 | 0.61 | 1.78 | -0.13 | -1    | -1    |
| 525.11 | 0.65 | 1.59 | 0.49  | 1     | 1     |
| 525.14 | 0.56 | 1.72 | 0.26  | -0.62 | -0.67 |
| 525.18 | 0.47 | 1.84 | 0.98  | -1    | -1    |
| 525.22 | 0.4  | 1.95 | 0.77  | 1     | 1     |
| 526.12 | 0.27 | 1.04 | -0.34 | 0.27  | 0.38  |
| 526.19 | 0.07 | 1.28 | -0.32 | -1    | -1    |
| 527.12 | 0.65 | 1.71 | -0.16 | -0.99 | -0.97 |
| 528.13 | 0.15 | 1.15 | 0.41  | 0.75  | 0.65  |
| 528.17 | 0.11 | 1.25 | 0.97  | -0.94 | -0.93 |
| 528.95 | 0.82 | 0.59 | -0.87 | 0.4   | 0.19  |
| 529.1  | 0.35 | 0.69 | -0.93 | 0.88  | 0.02  |
| 529.14 | 0.65 | 1.82 | 0.06  | -1    | -0.95 |
| 530.15 | 0.15 | 1.22 | -0.98 | 0.33  | 0.44  |
| 531.12 | 0.23 | 1.15 | 0.01  | -0.92 | -0.97 |
| 531.15 | 0.65 | 1.94 | 0.08  | -1    | -1    |
| 531.25 | 0.21 | 1.43 | -0.69 | 0.27  | -0.15 |
| 532.11 | 0.09 | 0.57 | 0.15  | -1    | -1    |
| 533.13 | 0.23 | 1.23 | -0.04 | -1    | -1    |
| 534.16 | 0.48 | 1.16 | 0.57  | -1    | -1    |
| 535.11 | 0.28 | 1.2  | -0.13 | -1    | -1    |
| 535.13 | 0.19 | 0.78 | 0.38  | -1    | -1    |
| 535.16 | 0.38 | 1.23 | -0.28 | -0.76 | -0.47 |

|        |      |      |       |       |       |
|--------|------|------|-------|-------|-------|
| 535.2  | 0.33 | 1.33 | 0.75  | 0.49  | 0.84  |
| 535.24 | 0.32 | 1.86 | -0.68 | 0.81  | 0.88  |
| 536.18 | 0.58 | 1.68 | -0.36 | 0.31  | 0.42  |
| 537.14 | 0.44 | 1.2  | -0.54 | -0.81 | -0.99 |
| 537.18 | 0.25 | 1.11 | 0.57  | -1    | -1    |
| 538.15 | 0.1  | 1.14 | 0.55  | -0.99 | -0.59 |
| 538.19 | 0.58 | 1.79 | 0.99  | 0.95  | 0.98  |
| 539.12 | 0.88 | 2    | 0.08  | -0.85 | -0.85 |
| 539.16 | 0.53 | 1.74 | 0.11  | -0.92 | -0.96 |
| 539.19 | 0.45 | 1.85 | 0.98  | 1     | 1     |
| 540.17 | 0.21 | 1.18 | 0.32  | 0.99  | 0.99  |
| 541.14 | 0.61 | 1.72 | -0.04 | -1    | -1    |
| 541.17 | 1.13 | 2.13 | 0.44  | -0.17 | 0     |
| 541.28 | 0.13 | 1.19 | -0.88 | 0.19  | -0.76 |
| 542.15 | 0.14 | 1.18 | -0.68 | -0.42 | -0.96 |
| 542.19 | 0.1  | 1.28 | 0.34  | -1    | -0.35 |
| 543.12 | 0.33 | 0.74 | -0.89 | 0.92  | 0.11  |
| 543.12 | 0.22 | 1.11 | -0.14 | -0.96 | -1    |
| 543.24 | 0.06 | 1.42 | -0.56 | -1    | -1    |
| 544.12 | 0.88 | 1.69 | 0.09  | -1    | -1    |
| 545.1  | 0.38 | 0.69 | -0.06 | -0.99 | -0.92 |
| 545.13 | 0.22 | 1.19 | 0.66  | -0.48 | -0.58 |
| 546.13 | 0.08 | 0.61 | 0.93  | -1    | -1    |
| 546.16 | 0.46 | 1.12 | -1    | -0.23 | -0.45 |
| 547.13 | 0.22 | 1.19 | 1     | -0.69 | 0.28  |
| 547.13 | 0.14 | 0.57 | -0.05 | 1     | 1     |
| 547.15 | 0.22 | 1.26 | 0.11  | -0.98 | -0.83 |
| 547.17 | 0.18 | 1.29 | 0.63  | -1    | -0.51 |
| 548.18 | 0.5  | 2    | 0.41  | -1    | -0.28 |
| 548.93 | 0.88 | 0.69 | -0.99 | -0.21 | -0.42 |
| 549.13 | 0.27 | 1.23 | -0.26 | -1    | -1    |
| 550.16 | 0.21 | 1.07 | 0.89  | -0.85 | -0.98 |
| 550.93 | 1.13 | 0.6  | -1    | -0.22 | -0.42 |
| 551.07 | 0.5  | 0.67 | 0.22  | -1    | -1    |
| 551.19 | 0.63 | 2.11 | 0.41  | 0.91  | 0.91  |
| 551.23 | 0.36 | 1.86 | 0.85  | 0.83  | 0.93  |

|        |      |      |       |       |       |
|--------|------|------|-------|-------|-------|
| 551.27 | 0.3  | 1.96 | 0.17  | 1     | 1     |
| 552.21 | 0.06 | 1.26 | 0.22  | -0.31 | 0.41  |
| 553.08 | 0.5  | 0.75 | 0.35  | -1    | -1    |
| 553.17 | 1.06 | 2    | -0.6  | 0.63  | -0.07 |
| 553.17 | 0.5  | 1.75 | 0.44  | -1    | -1    |
| 553.21 | 0.94 | 2.11 | 0.59  | 0.47  | 0.27  |
| 553.21 | 0.43 | 1.86 | 1     | 1     | 0.98  |
| 553.28 | 0.12 | 1.15 | -0.92 | 0.29  | -0.69 |
| 554.12 | 0.18 | 1.07 | -0.87 | -0.76 | -1    |
| 555.12 | 0.21 | 1.07 | -0.19 | -0.97 | -0.99 |
| 555.15 | 0.28 | 0.83 | -0.97 | 0.81  | -0.1  |
| 555.19 | 0.23 | 0.93 | -0.9  | 0.91  | 0.1   |
| 555.19 | 1.06 | 2.12 | 0.68  | -0.56 | -0.19 |
| 557.1  | 0.26 | 1.04 | 0.77  | -1    | -1    |
| 557.24 | 0.19 | 1.1  | 0.99  | 0.23  | 0.75  |
| 557.26 | 0.06 | 1.44 | 0.99  | 0.87  | 0.91  |
| 557.28 | 0.16 | 1.19 | -0.25 | -0.96 | -0.91 |
| 559.26 | 0.19 | 1.16 | 0.8   | 1     | 1     |
| 561.14 | 0.21 | 1.21 | 0.16  | 0.66  | 0.98  |
| 561.18 | 0.17 | 1.31 | 0.25  | -0.9  | -0.82 |
| 563.16 | 0.7  | 1.39 | 0.62  | -1    | -1    |
| 563.31 | 0.35 | 1.88 | -0.56 | 0.24  | 0.25  |
| 564.14 | 0.56 | 1.08 | 0.97  | 1     | 1     |
| 565.17 | 0.28 | 1.07 | -0.36 | -0.02 | -0.39 |
| 565.25 | 0.35 | 1.87 | 0.82  | 1     | 1     |
| 566.15 | 0.24 | 1.07 | 0.72  | 0.37  | 0.54  |
| 566.19 | 0.1  | 1.19 | 0.82  | 0.5   | 0.45  |
| 567.15 | 0.78 | 2    | -0.98 | 0.33  | 0.45  |
| 567.19 | 1    | 2    | 0.13  | 0.1   | 0.14  |
| 567.23 | 0.89 | 2.11 | 0.82  | 1     | 0.99  |
| 567.26 | 0.15 | 1.09 | -0.98 | 0.48  | -0.52 |
| 568.17 | 0.13 | 1.17 | 0.57  | -0.58 | 0     |
| 569.13 | 0.21 | 1.1  | -0.39 | -0.99 | -0.9  |
| 569.17 | 0.27 | 0.87 | -0.74 | 0.86  | 0.23  |
| 569.17 | 1.12 | 2    | 0.2   | -0.9  | -0.95 |
| 569.2  | 1    | 2.11 | 0.85  | 0.18  | 0.2   |

|        |      |      |       |       |       |
|--------|------|------|-------|-------|-------|
| 569.24 | 0.19 | 1.06 | 0.9   | 0.86  | 0.93  |
| 569.28 | 0.15 | 1.15 | 0.95  | -0.21 | -0.95 |
| 570.18 | 0.13 | 1.23 | -0.11 | 1     | -1    |
| 571.18 | 1.12 | 2.12 | 0.23  | -1    | -1    |
| 571.22 | 0.26 | 2    | 0.93  | 1     | 1     |
| 573.27 | 0.19 | 1.19 | 1     | 1     | 1     |
| 575.12 | 0.25 | 1.14 | 0.98  | -0.43 | 0.33  |
| 575.16 | 0.21 | 1.24 | -0.06 | -0.73 | -0.96 |
| 575.23 | 0.3  | 1.33 | -0.5  | -1    | -1    |
| 575.25 | 0.19 | 1.42 | 0.79  | 1     | 1     |
| 576.96 | 0.78 | 0.83 | -0.71 | -0.84 | -0.94 |
| 577.08 | 0.17 | 0.53 | -0.54 | -0.61 | -0.81 |
| 577.21 | 0.34 | 1.31 | -0.24 | 1     | 1     |
| 578.19 | 0.19 | 1.13 | 0.58  | 0.62  | 0.71  |
| 579.19 | 0.27 | 1.1  | -1    | -1    | -1    |
| 579.21 | 0.05 | 0.68 | -0.73 | -0.09 | -0.45 |
| 579.28 | 0.42 | 1.88 | 0.31  | 0.36  | 0.47  |
| 581.13 | 0.55 | 1.95 | -0.81 | 0.97  | 0.27  |
| 581.21 | 0.45 | 1.77 | 0.99  | -1    | -1    |
| 581.24 | 0.85 | 2.1  | 0.92  | 1     | 1     |
| 581.28 | 0.15 | 1.12 | -0.1  | 0.75  | 0.68  |
| 583.11 | 0.24 | 1.03 | -0.66 | 0.01  | 0.01  |
| 583.15 | 0.2  | 1.13 | -0.13 | -0.96 | -0.99 |
| 583.18 | 1.06 | 2    | 0.44  | -0.39 | -0.14 |
| 583.22 | 0.95 | 2.11 | 0.83  | 0.05  | -0.06 |
| 583.26 | 0.18 | 1.09 | 1     | -0.24 | 0.52  |
| 583.29 | 0.15 | 1.18 | 0.99  | 1     | 1     |
| 585.11 | 0.16 | 0.49 | -0.54 | -0.97 | -0.88 |
| 585.2  | 1.06 | 2.11 | 0.64  | -1    | -1    |
| 585.24 | 0.25 | 2    | 0.99  | 1     | 1     |
| 585.27 | 0.18 | 1.15 | 0.94  | 0.92  | 0.87  |
| 587.14 | 0.43 | 1.81 | -0.22 | -1    | -1    |
| 587.18 | 0.08 | 0.73 | 0.01  | -0.53 | -0.23 |
| 587.2  | 0.16 | 1.29 | -0.5  | -0.35 | -0.99 |
| 587.29 | 0.31 | 1.38 | 0.89  | -0.92 | -0.11 |
| 587.29 | 0.18 | 1.21 | 0.89  | -1    | -1    |

|        |      |      |       |       |       |
|--------|------|------|-------|-------|-------|
| 589.14 | 0.16 | 0.59 | 0.91  | 1     | 1     |
| 589.18 | 0.2  | 1.27 | 0.15  | -0.85 | -0.88 |
| 590.15 | 0.52 | 1.07 | 0.28  | -1    | -1    |
| 591.16 | 0.36 | 1.21 | -0.79 | -0.99 | -0.69 |
| 591.19 | 0.13 | 0.74 | -0.22 | -1    | -1    |
| 592.88 | 0.62 | 0.38 | -0.99 | -0.23 | -0.44 |
| 593.21 | 0.43 | 1.7  | -0.88 | -0.87 | -0.9  |
| 595.18 | 1    | 1.89 | -0.86 | 0.42  | 0.22  |
| 595.22 | 0.43 | 1.78 | 0.85  | -1    | -1    |
| 595.26 | 0.81 | 2.1  | 0.34  | -0.56 | -0.47 |
| 597.11 | 0.32 | 0.96 | 0.31  | -1    | -1    |
| 597.13 | 0.23 | 1.07 | 0.14  | -0.99 | -0.99 |
| 597.16 | 1.11 | 1.89 | 0.09  | -1    | -1    |
| 597.2  | 1    | 2    | 0.63  | -0.87 | -0.68 |
| 597.24 | 0.21 | 1.03 | -0.27 | 0.81  | 0.32  |
| 597.27 | 0.18 | 1.12 | 0.23  | -0.06 | -0.47 |
| 599.11 | 0.28 | 1.03 | 1     | -1    | -1    |
| 599.13 | 0.68 | 1.12 | -0.88 | -1    | -1    |
| 599.25 | 0.24 | 2    | 0.46  | -1    | -1    |
| 599.29 | 0.18 | 1.18 | 1     | 1     | 1     |
| 600.39 | 0.05 | 1.41 | -0.35 | 0.55  | 0.47  |
| 601.12 | 0.38 | 0.76 | -0.98 | -0.99 | -1    |
| 601.14 | 0.34 | 1.1  | -0.88 | -0.37 | -0.25 |
| 601.19 | 0.07 | 0.76 | -1    | -1    | -0.99 |
| 601.21 | 0.16 | 1.31 | -0.64 | -0.18 | -0.94 |
| 601.23 | 0.22 | 1.31 | -0.26 | -0.21 | -0.09 |
| 601.25 | 0.22 | 1.38 | -0.15 | 0.99  | 1     |
| 601.27 | 0.18 | 1.39 | -0.81 | 0.27  | -0.34 |
| 603.1  | 0.16 | 0.55 | -0.41 | -0.94 | -0.98 |
| 603.14 | 0.38 | 0.83 | -0.14 | -1    | -1    |
| 603.16 | 0.34 | 1.17 | -0.38 | 1     | 1     |
| 603.19 | 0.19 | 1.29 | 0.17  | -0.87 | -0.86 |
| 603.19 | 0.13 | 0.72 | 0.06  | -0.23 | -0.56 |
| 603.23 | 0.16 | 1.38 | 0.94  | 0.92  | 0.92  |
| 603.28 | 0.18 | 1.45 | 0.39  | 1     | 1     |
| 604.17 | 0.07 | 0.56 | -0.83 | -0.33 | -0.5  |



|        |      |      |       |       |       |
|--------|------|------|-------|-------|-------|
| 605.12 | 0.16 | 0.61 | -0.38 | -0.86 | -0.99 |
| 605.17 | 0.34 | 1.24 | -0.32 | 1     | 1     |
| 606.96 | 0.69 | 0.31 | -0.8  | 0.34  | 0.08  |
| 607.19 | 0.29 | 1.06 | 0.96  | -1    | -1    |
| 607.22 | 0.86 | 1.9  | -0.91 | -0.06 | -0.42 |
| 609.16 | 1.05 | 1.79 | -0.93 | -0.95 | -0.98 |
| 609.2  | 0.95 | 1.9  | -0.31 | -0.69 | -0.77 |
| 609.24 | 0.86 | 2    | 0.45  | 0.24  | -0.36 |
| 609.27 | 0.77 | 2.09 | 0.24  | -1    | -1    |
| 609.29 | 0.06 | 1.39 | 0.97  | -0.99 | -0.62 |
| 611.14 | 0.23 | 1.1  | 0.62  | 1     | 1     |
| 611.18 | 0.28 | 0.88 | -0.71 | -0.53 | -0.67 |
| 611.22 | 0.95 | 2    | 0.5   | -1    | -1    |
| 611.25 | 0.18 | 1.29 | -0.85 | 0.9   | 0.36  |
| 613.16 | 0.1  | 0.66 | 0.33  | 1     | 1     |
| 613.27 | 0.18 | 1.35 | -0.7  | 0.43  | -0.17 |
| 615.14 | 0.37 | 0.8  | -0.92 | -0.94 | -0.97 |
| 615.25 | 0.21 | 1.33 | 0.87  | 1     | 1     |
| 615.26 | 0.36 | 2    | 0.85  | 0.61  | 0.76  |
| 617.12 | 0.15 | 0.59 | 0.11  | -0.73 | -0.81 |
| 617.15 | 0.1  | 0.52 | -0.91 | 0.86  | 0.98  |
| 617.19 | 0.1  | 0.76 | 0.14  | -1    | -1    |
| 619.1  | 0.18 | 0.55 | 0.41  | -1    | -1    |
| 619.13 | 0.15 | 0.64 | 0.13  | -1    | -1    |
| 619.22 | 0.29 | 1.35 | -0.46 | -1    | -1    |
| 620.99 | 0.65 | 0.38 | 0.12  | -0.36 | -0.9  |
| 621.29 | 0.05 | 1.35 | -0.04 | -0.74 | -0.95 |
| 621.29 | 0.58 | 2.08 | 0.64  | 0.68  | 0.76  |
| 622.99 | 0.08 | 0.31 | -0.78 | 0.01  | -0.86 |
| 623.18 | 1    | 1.8  | -0.7  | -1    | -1    |
| 623.25 | 0.2  | 1.03 | -0.7  | 0.17  | 0.07  |
| 625.11 | 0.34 | 0.93 | -0.48 | -0.99 | -0.97 |
| 625.16 | 0.1  | 0.64 | -0.21 | 1     | 0.69  |
| 625.19 | 0.07 | 0.72 | 0.11  | 1     | 1     |
| 625.19 | 0.27 | 0.91 | -0.71 | -0.74 | -0.82 |
| 625.29 | 0.48 | 1.88 | 0.93  | 0.84  | 0.89  |

|        |      |      |       |       |       |
|--------|------|------|-------|-------|-------|
| 627.17 | 0.1  | 0.69 | -0.35 | -0.91 | -0.95 |
| 627.28 | 0.17 | 1.37 | 0.68  | 0.99  | 1     |
| 628.2  | 0.35 | 1.16 | 0.98  | -1    | -0.68 |
| 629.03 | 0.35 | 0.61 | -0.87 | 1     | 1     |
| 629.12 | 0.15 | 0.58 | -0.19 | -1    | -1    |
| 629.23 | 0.07 | 0.81 | 0.73  | -0.29 | 0.08  |
| 629.24 | 0.15 | 1.35 | 0.02  | -0.78 | -0.93 |
| 629.26 | 0.21 | 1.35 | 0.73  | -1    | -1    |
| 629.28 | 0.26 | 1.35 | -0.66 | -0.15 | -0.93 |
| 631.13 | 0.55 | 0.97 | -0.77 | 0.98  | 0.33  |
| 631.13 | 0.15 | 0.63 | 0.16  | -0.89 | -0.96 |
| 631.17 | 0.35 | 0.9  | 0.09  | -0.59 | -0.24 |
| 631.22 | 0.12 | 0.78 | -0.51 | 1     | 1     |
| 633.11 | 0.18 | 0.59 | 0     | -0.63 | -0.86 |
| 633.2  | 0.15 | 0.75 | 0.83  | 1     | 1     |
| 633.24 | 0.34 | 1.31 | -0.45 | -1    | -1    |
| 635.27 | 0.04 | 0.8  | -0.2  | 1     | 1     |
| 635.31 | 0.05 | 1.37 | -0.79 | -0.22 | -1    |
| 636.94 | 0.54 | 0.67 | -0.7  | -1    | -1    |
| 637.18 | 0.12 | 0.62 | -0.68 | -0.92 | -0.98 |
| 637.23 | 0.86 | 1.91 | 0.89  | -0.42 | -0.72 |
| 637.27 | 0.19 | 1.06 | -0.81 | 0     | -0.1  |
| 637.29 | 0.04 | 0.84 | 0.52  | 1     | 1     |
| 638.94 | 0.95 | 0.43 | -0.57 | -1    | -1    |
| 639.17 | 1.05 | 1.8  | 0.97  | 1     | 1     |
| 639.21 | 0.26 | 0.94 | -0.54 | -0.58 | -0.67 |
| 639.28 | 0.78 | 2.09 | -0.9  | -0.92 | -0.96 |
| 641.15 | 0.12 | 0.64 | 0.39  | -0.98 | -0.92 |
| 641.19 | 0.09 | 0.72 | 0.09  | -1    | -1    |
| 641.3  | 0.21 | 2    | 0.55  | 1     | 1     |
| 643.13 | 0.15 | 0.61 | 0.34  | -0.52 | -0.21 |
| 643.17 | 0.34 | 0.88 | -0.91 | -0.93 | -0.97 |
| 643.19 | 0.21 | 1.21 | -0.16 | -0.66 | -0.98 |
| 643.2  | 0.09 | 0.77 | 0.74  | -1    | -1    |
| 645.11 | 0.18 | 0.58 | 0.89  | -1    | -1    |
| 645.15 | 0.15 | 0.66 | 0.35  | -0.82 | -0.87 |

|        |      |      |       |       |       |
|--------|------|------|-------|-------|-------|
| 646.12 | 1.05 | 1.45 | -0.02 | -0.99 | -0.96 |
| 646.18 | 0.14 | 1.06 | 0.58  | 0.65  | 1     |
| 647.13 | 0.18 | 0.63 | 0.17  | -1    | -1    |
| 647.19 | 0.23 | 1.06 | -0.27 | -0.51 | -0.27 |
| 647.23 | 0.07 | 0.71 | -0.99 | 0.27  | 0.38  |
| 647.25 | 0.33 | 1.33 | -0.97 | -0.01 | -0.7  |
| 648.18 | 0.22 | 0.86 | 0.81  | 0.75  | 0.88  |
| 649.19 | 0.2  | 0.73 | -0.56 | -1    | -1    |
| 649.21 | 0.48 | 1.23 | 0.24  | -0.18 | 0.19  |
| 649.3  | 0.16 | 1.11 | -0.82 | 1     | 1     |
| 651.21 | 0.91 | 1.82 | 0.83  | -0.17 | 0.44  |
| 651.25 | 0.83 | 1.91 | 0.95  | -1    | -1    |
| 651.3  | 0.04 | 0.87 | -0.33 | 1     | 1     |
| 653.14 | 0.64 | 1.07 | 0.07  | -1    | -1    |
| 653.23 | 0.07 | 0.78 | -0.02 | 0.47  | 0.49  |
| 653.26 | 0.22 | 1.06 | -0.5  | 1     | 1     |
| 653.3  | 0.54 | 2.12 | -0.94 | 1     | 1     |
| 655.17 | 0.12 | 0.67 | -0.24 | 0.64  | 0.03  |
| 655.19 | 0.14 | 0.67 | -0.87 | -1    | -1    |
| 655.2  | 0.09 | 0.75 | 0.27  | -1    | -1    |
| 655.24 | 0.07 | 0.82 | 0.99  | 1     | 1     |
| 655.28 | 0.19 | 1.33 | -0.39 | -1    | -1    |
| 657.26 | 0.38 | 1.24 | 0.12  | 0.97  | 0.66  |
| 657.29 | 0.34 | 1.31 | -0.95 | 0.09  | -0.15 |
| 659.13 | 0.17 | 0.61 | -0.32 | -0.96 | -0.92 |
| 659.16 | 0.52 | 1.03 | -0.07 | 0.98  | 0.82  |
| 659.22 | 0.21 | 1.29 | 0.14  | -0.85 | -0.88 |
| 659.22 | 0.59 | 1.38 | 0.24  | 1     | 1     |
| 659.27 | 0.38 | 1.29 | 0.33  | 1     | 1     |
| 661.14 | 0.57 | 1    | 0.28  | 0.86  | 0.97  |
| 661.18 | 0.52 | 1.1  | 0.85  | -0.19 | 0.41  |
| 661.2  | 0.17 | 0.73 | -0.34 | -1    | -1    |
| 661.27 | 0.32 | 1.35 | 0.76  | 0.73  | 0.64  |
| 662.19 | 0.21 | 0.89 | 0.01  | 0.39  | 0.22  |
| 663.18 | 0.13 | 0.62 | -0.71 | -1    | -1    |
| 664.19 | 0.83 | 1.74 | 0.99  | -0.54 | 0.67  |

|        |      |      |       |       |       |
|--------|------|------|-------|-------|-------|
| 664.2  | 0.2  | 0.76 | -0.77 | 0.34  | -0.27 |
| 665.23 | 0.87 | 1.83 | 0.93  | -1    | -1    |
| 665.24 | 0.22 | 1.22 | 0.31  | 0.6   | 0.7   |
| 665.3  | 0.18 | 1.11 | -0.99 | -0.5  | -0.59 |
| 666.3  | 0.55 | 1.69 | -0.38 | 1     | 0.92  |
| 666.96 | 0.77 | 0.31 | -0.67 | -0.45 | -0.33 |
| 667.21 | 0.95 | 1.82 | 0.66  | 1     | 1     |
| 667.24 | 0.25 | 1    | -0.49 | 0.11  | -0.29 |
| 669.15 | 0.14 | 0.63 | 0.48  | 0.23  | -0.53 |
| 669.18 | 0.29 | 1.12 | -0.94 | 0.08  | -0.94 |
| 669.2  | 0.14 | 0.7  | -0.76 | 1     | 1     |
| 669.22 | 0.09 | 0.78 | 0.59  | -0.29 | -0.4  |
| 669.28 | 0.22 | 1.33 | -0.3  | 1     | 1     |
| 671.16 | 0.14 | 0.67 | -0.05 | -1    | -1    |
| 671.2  | 0.11 | 0.75 | 0.37  | -1    | -1    |
| 671.24 | 0.26 | 1.26 | 0.88  | 1     | 1     |
| 671.31 | 0.1  | 1.26 | 0.05  | -1    | -1    |
| 673.14 | 0.17 | 0.64 | -0.47 | -1    | -1    |
| 673.18 | 0.33 | 1.15 | 0.25  | -0.85 | -0.78 |
| 673.21 | 0.45 | 1.15 | -0.99 | -0.23 | -0.75 |
| 675.12 | 0.2  | 0.61 | 0.66  | -1    | -1    |
| 675.23 | 0.45 | 1.21 | 0.99  | 1     | 1     |
| 675.3  | 0.15 | 1.28 | -0.16 | -0.98 | -0.69 |
| 677.21 | 0.11 | 0.67 | -0.97 | -0.56 | -0.93 |
| 679.29 | 0.63 | 1.96 | -0.04 | -0.74 | -0.95 |
| 681.15 | 1.1  | 1.62 | -0.5  | -0.82 | -0.92 |
| 681.24 | 0.25 | 1.22 | -0.92 | -1    | -1    |
| 681.26 | 0.24 | 1.03 | -0.33 | -0.38 | -0.49 |
| 681.28 | 0.22 | 1.3  | -0.07 | 0.92  | 1     |
| 681.31 | 0.18 | 1.37 | -0.33 | -0.89 | -0.47 |
| 683.16 | 0.14 | 0.66 | -0.83 | -0.7  | -0.77 |
| 683.2  | 0.11 | 0.73 | -0.37 | -1    | -1    |
| 683.22 | 0.29 | 1.2  | -0.35 | 0.14  | -0.04 |
| 683.29 | 0.69 | 2.04 | -0.06 | -0.73 | -0.96 |
| 683.29 | 0.13 | 1.37 | 0.53  | 0.57  | 0.66  |
| 683.31 | 0.18 | 1.37 | -0.86 | 0.18  | -0.42 |

|        |      |      |       |       |       |
|--------|------|------|-------|-------|-------|
| 685.14 | 0.53 | 0.94 | 0.02  | 0.96  | 0.87  |
| 685.18 | 0.14 | 0.7  | -0.18 | -1    | -1    |
| 685.27 | 0.25 | 1.33 | 0.69  | 0.73  | 0.81  |
| 685.29 | 0.13 | 1.21 | -0.86 | -0.09 | -0.19 |
| 687.16 | 0.53 | 1    | 0.91  | 0.7   | 0.98  |
| 687.19 | 0.14 | 0.75 | 0.16  | -0.99 | -0.98 |
| 687.23 | 0.44 | 1.18 | 0.85  | -0.88 | -0.65 |
| 687.27 | 0.4  | 1.26 | 1     | 0.66  | 0.88  |
| 687.3  | 0.15 | 1.25 | -0.48 | -0.73 | -1    |
| 689.3  | 0.48 | 1.9  | -0.45 | 0.65  | 0.47  |
| 691.19 | 0.13 | 0.62 | -0.89 | 0.12  | -0.47 |
| 691.22 | 0.11 | 0.7  | -0.85 | -1    | -1    |
| 691.28 | 0.18 | 1.23 | -0.91 | 0.62  | -0.12 |
| 693.2  | 0.13 | 0.67 | -0.92 | -0.97 | -0.82 |
| 693.24 | 0.24 | 1.19 | 0.3   | 0.27  | 0.42  |
| 693.31 | 0.61 | 1.96 | 0.27  | -0.91 | -0.81 |
| 693.31 | 0.18 | 1.33 | -0.16 | -0.1  | 0.01  |
| 695.24 | 0.09 | 0.79 | 0.61  | -0.44 | -0.55 |
| 697.16 | 0.35 | 1.06 | -0.02 | -0.95 | -0.59 |
| 697.18 | 1.05 | 1.73 | 0.13  | -0.76 | -0.83 |
| 697.21 | 0.11 | 0.76 | 0.55  | -1    | -1    |
| 697.23 | 0.28 | 1.22 | -0.18 | 0.41  | 0.82  |
| 697.25 | 0.09 | 0.83 | 0.59  | -1    | -1    |
| 697.32 | 0.54 | 2.11 | -0.57 | -0.56 | -0.64 |
| 699.16 | 0.16 | 0.66 | -0.17 | -0.9  | -0.85 |
| 699.27 | 0.39 | 1.22 | -0.91 | -0.93 | -0.97 |
| 699.29 | 0.24 | 1.35 | -0.51 | -1    | -1    |
| 699.3  | 0.35 | 1.3  | -0.03 | -1    | -1    |
| 701.26 | 0.28 | 1.33 | -0.29 | -0.24 | -0.13 |
| 701.3  | 0.64 | 1.79 | -0.51 | -0.71 | -1    |
| 701.32 | 0.15 | 1.27 | -0.41 | -0.78 | -0.99 |
| 703.19 | 0.52 | 1.09 | 0.03  | -0.44 | -0.81 |
| 705.26 | 0.06 | 0.8  | 0.72  | -1    | -1    |
| 705.28 | 0.21 | 1.23 | 0.06  | 0.11  | 0.22  |
| 705.31 | 0.18 | 1.3  | -0.77 | 0.8   | 0.74  |
| 707.31 | 0.52 | 1.97 | -0.97 | 1     | 1     |

|        |      |      |       |       |       |
|--------|------|------|-------|-------|-------|
| 708.22 | 0.19 | 1.19 | 0.54  | -1    | -1    |
| 709.18 | 1    | 1.65 | 0.94  | 1     | 1     |
| 709.22 | 0.92 | 1.75 | 0.85  | 0.9   | 0.46  |
| 709.25 | 0.08 | 0.81 | 0.8   | 1     | 1     |
| 709.31 | 0.21 | 1.33 | -0.84 | -1    | -1    |
| 711.18 | 0.02 | 0.43 | -0.29 | -0.48 | -0.27 |
| 711.19 | 1    | 1.74 | 0.63  | -0.57 | -0.15 |
| 711.21 | 0.31 | 1.17 | -0.98 | -1    | -1    |
| 711.27 | 0.08 | 0.85 | 0.9   | 1     | 1     |
| 713.17 | 0.16 | 0.69 | -0.96 | -0.97 | -0.99 |
| 713.21 | 0.13 | 0.76 | 0.62  | -0.71 | -0.59 |
| 713.25 | 0.42 | 1.17 | -0.74 | 0.38  | -0.22 |
| 713.32 | 0.34 | 1.32 | -0.91 | -0.53 | -0.86 |
| 715.21 | 0.34 | 1.2  | -0.56 | -0.93 | -0.65 |
| 715.24 | 0.06 | 0.87 | -0.12 | -0.89 | -0.99 |
| 715.28 | 0.32 | 1.3  | 0.11  | -0.36 | -0.9  |
| 715.3  | 0.06 | 0.8  | -0.29 | 0.61  | 0.52  |
| 715.33 | 0.34 | 1.37 | -0.3  | -1    | -1    |
| 717.22 | 0.02 | 0.54 | -0.5  | -0.96 | -0.89 |
| 717.28 | 0.2  | 1.2  | -0.74 | 0.38  | -0.23 |
| 717.31 | 0.38 | 1.35 | -0.58 | -1    | -1    |
| 719.25 | 0.23 | 1.18 | -0.43 | -0.38 | -0.27 |
| 719.29 | 0.2  | 1.25 | 0.76  | 0.27  | 0.63  |
| 719.48 | 0.12 | 1.74 | 0.41  | 0.27  | 0.64  |
| 721.25 | 0.81 | 1.77 | -0.42 | -0.91 | -0.91 |
| 721.29 | 0.06 | 0.86 | -0.87 | -0.82 | -0.95 |
| 721.31 | 0.2  | 1.3  | -0.98 | 1     | 1     |
| 723.21 | 0.81 | 1.73 | -0.99 | 0.72  | -0.24 |
| 723.23 | 0.41 | 1.08 | -0.7  | 0.44  | -0.17 |
| 723.25 | 0.26 | 1.21 | -0.57 | 0.06  | 0.18  |
| 723.27 | 0.37 | 1.16 | -0.64 | 1     | 0.5   |
| 725.17 | 0.15 | 0.67 | -0.97 | -0.44 | -0.64 |
| 725.19 | 0.09 | 0.74 | -0.36 | -0.89 | -0.57 |
| 725.21 | 0.13 | 0.74 | -0.53 | -0.57 | -0.66 |
| 725.25 | 0.41 | 1.14 | -0.68 | 1     | 0.44  |
| 725.25 | 0.1  | 0.81 | 0.27  | -0.05 | -0.62 |

|        |      |      |       |       |       |
|--------|------|------|-------|-------|-------|
| 725.28 | 0.23 | 1.28 | 1     | 1     | 1     |
| 725.3  | 0.28 | 1.28 | 0.07  | -0.81 | -0.91 |
| 727.26 | 0.41 | 1.19 | 0.05  | -0.69 | -0.76 |
| 727.3  | 0.37 | 1.26 | -0.85 | 0.21  | -0.4  |
| 729.22 | 0.02 | 0.53 | 0.83  | -0.11 | 0.81  |
| 729.28 | 0.41 | 1.24 | 0.99  | 1     | 1     |
| 729.31 | 0.06 | 0.82 | 0.6   | 0.55  | 0.45  |
| 731.29 | 0.2  | 1.22 | -0.68 | -0.63 | -0.9  |
| 733.23 | 0.26 | 1.13 | -1    | -0.99 | -0.97 |
| 733.27 | 0.23 | 1.2  | -0.12 | -0.07 | 0.05  |
| 735.3  | 0.33 | 1.2  | -0.97 | 0.02  | -0.7  |
| 735.32 | 0.12 | 1.33 | -0.83 | 1     | -1    |
| 737.19 | 0.02 | 0.45 | -0.69 | -0.12 | -0.92 |
| 737.21 | 0.13 | 0.73 | -0.3  | 1     | 1     |
| 737.25 | 0.26 | 1.18 | -0.42 | 0.63  | 0.99  |
| 737.28 | 0.08 | 0.86 | -0.27 | -1    | -1    |
| 739.21 | 0.32 | 1.14 | 0.62  | -1    | -1    |
| 739.23 | 0.13 | 0.77 | 0.5   | -0.34 | -0.55 |
| 739.28 | 0.26 | 1.28 | -0.81 | 1     | 1     |
| 741.2  | 0.15 | 0.74 | 0.43  | -1    | -1    |
| 741.22 | 0.08 | 0.81 | -0.79 | -0.87 | -0.99 |
| 741.26 | 0.06 | 0.88 | -0.9  | -0.04 | 0.08  |
| 741.28 | 0.39 | 1.21 | 0.82  | -1    | -1    |
| 741.31 | 0.36 | 1.28 | -0.67 | -1    | -1    |
| 743.28 | 0.15 | 0.85 | -0.27 | 1     | 1     |
| 745.25 | 0.02 | 0.59 | -0.27 | -0.32 | -0.21 |
| 747.18 | 0.56 | 1.06 | -0.44 | -1    | -1    |
| 747.32 | 0.19 | 1.29 | -0.13 | 1     | 1     |
| 751.21 | 0.02 | 0.47 | -0.73 | 0.03  | -0.86 |
| 751.24 | 0.06 | 0.82 | -0.99 | -0.37 | -0.68 |
| 751.26 | 0.1  | 0.82 | -0.55 | -0.2  | -0.54 |
| 751.28 | 0.17 | 1.27 | -0.82 | 0.2   | 0.32  |
| 751.32 | 0.63 | 1.9  | 0.62  | 0.9   | 0.98  |
| 753.19 | 0.03 | 0.45 | -0.44 | -0.32 | -0.24 |
| 753.21 | 0.96 | 1.68 | 0.99  | 1     | 1     |
| 753.24 | 0.12 | 0.8  | 0.78  | 1     | 1     |

|        |      |      |       |       |       |
|--------|------|------|-------|-------|-------|
| 753.26 | 0.2  | 1.25 | -0.06 | -0.01 | 0.11  |
| 753.28 | 0.38 | 1.18 | -0.88 | -0.04 | -0.79 |
| 757.31 | 0.38 | 1.28 | -0.25 | 1     | -1    |
| 761.26 | 0.24 | 1.17 | -0.89 | -0.56 | -0.82 |
| 761.3  | 0.21 | 1.24 | -0.72 | 1     | 1     |
| 763.21 | 0.02 | 0.47 | -0.89 | 0.21  | -0.74 |
| 763.24 | 0.06 | 0.8  | -0.97 | -0.96 | -0.91 |
| 763.32 | 0.61 | 1.84 | -1    | -1    | 1     |
| 765.26 | 0.2  | 1.22 | -0.72 | -0.68 | -0.59 |
| 765.3  | 0.67 | 1.83 | -0.16 | -0.98 | -0.69 |
| 765.31 | 0.34 | 1.22 | -0.74 | -1    | -1    |
| 767.22 | 0.92 | 1.69 | 0.99  | -1    | -1    |
| 767.27 | 0.04 | 0.75 | -0.37 | -0.48 | -1    |
| 767.31 | 0.21 | 1.14 | -0.25 | -0.58 | -1    |
| 769.25 | 0.08 | 0.86 | -0.61 | -1    | -1    |
| 769.31 | 0.38 | 1.25 | -0.83 | -0.24 | -0.24 |
| 771.22 | 0.34 | 1.16 | 1     | -1    | -1    |
| 771.23 | 0.03 | 0.54 | 0.05  | -0.43 | 0.2   |
| 771.25 | 0.12 | 0.71 | -0.97 | -0.38 | -0.82 |
| 771.29 | 0.21 | 1.16 | -0.98 | -0.14 | -0.69 |
| 773.23 | 0.49 | 1.14 | 0.15  | -0.99 | -0.99 |
| 773.26 | 0.24 | 1.14 | -0.93 | 0.02  | -0.56 |
| 773.3  | 0.26 | 1.16 | -0.73 | -0.31 | -1    |
| 773.3  | 0.21 | 1.21 | -0.07 | 0.77  | 0.7   |
| 777.22 | 0.02 | 0.49 | -0.95 | 0.4   | -0.45 |
| 779.2  | 0.1  | 0.74 | 0.36  | -0.56 | -0.09 |
| 781.25 | 0.02 | 0.56 | -0.2  | 0.26  | 0.33  |
| 789.22 | 0.51 | 1.14 | -0.19 | -1    | -1    |
| 789.33 | 0.58 | 1.79 | -0.53 | 0.38  | 0.28  |
| 791.31 | 0.63 | 1.78 | -0.44 | -0.66 | -0.47 |
| 793.25 | 0.08 | 0.83 | -0.83 | -0.59 | -0.86 |
| 793.29 | 0.04 | 0.76 | -0.51 | -0.33 | -0.98 |
| 793.33 | 0.28 | 1.26 | -0.72 | -0.84 | -0.98 |
| 795.23 | 0.03 | 0.52 | -0.5  | -0.83 | -1    |
| 797.25 | 0.03 | 0.56 | -0.98 | -0.29 | -0.75 |
| 797.28 | 0.02 | 0.61 | 0.2   | 0.99  | 0.73  |



|        |      |      |       |       |       |
|--------|------|------|-------|-------|-------|
| 801.26 | 0.13 | 0.73 | -0.58 | -1    | -0.99 |
| 803.24 | 0.02 | 0.51 | -0.87 | -0.16 | -0.5  |
| 807.31 | 0.3  | 1.21 | 0.91  | -0.95 | -0.49 |
| 817.29 | 0.64 | 1.67 | 0.49  | -0.22 | -0.2  |
| 821.29 | 0.2  | 1.23 | -0.93 | -1    | -1    |
| 823.23 | 0.05 | 0.52 | 0.85  | -1    | -1    |
| 825.24 | 0.05 | 0.55 | 0.99  | 0.85  | 1     |
| 833.25 | 0.03 | 0.53 | -0.58 | 0.65  | -0.03 |
| 835.26 | 0.03 | 0.56 | -0.91 | -0.83 | -0.93 |
| 835.3  | 0.05 | 0.77 | -0.97 | -0.45 | -0.94 |
| 839.26 | 0.05 | 0.57 | -0.45 | -0.97 | -1    |
| 851.3  | 0.03 | 0.62 | 0.88  | 0.75  | 0.99  |

Table S3. Fragmentation mass spectra with library matches of the tentatively identified structures using the GNPS molecular networking system. Experimental spectra were collected from representative days between T0 and T22. Universal spectrum identifiers (USI) can be used to access the data on the GNPS community website at <https://gnps.ucsd.edu/>

| Tentatively Identified Molecule Name | Experimental MS/MS                                                                  | Library MS/MS                                                                        | Universal Spectrum Identifier (USI)                                                    |
|--------------------------------------|-------------------------------------------------------------------------------------|--------------------------------------------------------------------------------------|----------------------------------------------------------------------------------------|
| coproporphyrin I                     | 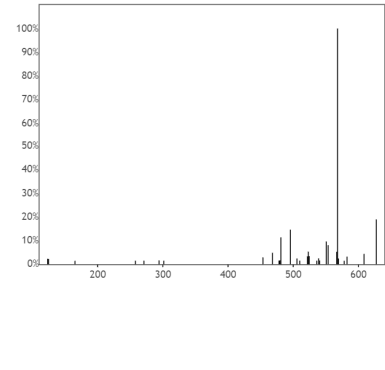   |    | mzspec:MSV00084741:20190808_DOM_2.mzXML:scan:3659                                      |
| coproporphyrin III                   |   |   | mzspec:MassIVE:TASK-9d2cd83d90d34de49af97280fbc6a25e-spectra/spectra_ms.mgf:scan:28813 |
| N-phenethylcinnamide                 |  |  | mzspec:MSV00084741:20190813_DOM_1.mzXML:scan:1898                                      |

|                                            |                                                                                   |                                                                                    |                                                                               |
|--------------------------------------------|-----------------------------------------------------------------------------------|------------------------------------------------------------------------------------|-------------------------------------------------------------------------------|
| <p>1,9-hydroxyisorhodop<br/>tilometrin</p> | 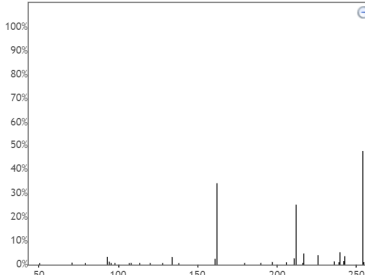 |  | <p>mzspec:MSV0<br/>00084741:20<br/>190812_DOM<br/>_2.mzXML:sc<br/>an:3124</p> |
| <p>5,7-dihydroxyisoflavo<br/>ne</p>        |  |  | <p>mzspec:MSV0<br/>00084741:20<br/>190806_DOM<br/>_2.mzXML:sc<br/>an:2916</p> |
